# Supplementary material for: Effect of extracellular matrix proteins on the differentiation of human pluripotent stem cells into mesenchymal stem cells
Source: Royal Society of Chemistry journal article supplement (doi:10.1039/d2tb01026g), 2022-01-01
Supplement: d2tb01026g1.pdf [file d2tb01026g1.pdf]

## Effect of extracellular matrix proteins on the differentiation of human pluripotent stem cells into mesenchymal stem cells

Zeyu Tian,<sup>‡a</sup> Chun-Ko Wang,<sup>‡b</sup> Feng-Ling Lin,<sup>‡c</sup> Qian Liu,<sup>a</sup> Ting Wang,<sup>a</sup> Tzu-Cheng Sung,<sup>a</sup> Abdullah A. Alarfaj,<sup>d</sup> Abdurahman H. Hirad,<sup>d</sup> Henry Hsin-Chung Lee,<sup>\*e,f,g</sup> Gwo-Jang Wu,<sup>\*h</sup> Akon Higuchi<sup>\*a,b,i,j</sup>

<sup>a</sup>School of Ophthalmology and Optometry, Eye Hospital, Wenzhou Medical University, No. 270, Xueyuan Road, Wenzhou, Zhejiang, 325027, China

<sup>b</sup>Department of Chemical and Materials Engineering, National Central University, No. 300, Jhongda RD., Jhongli, Taoyuan 32001, Taiwan

<sup>c</sup>Department of Dermatology, Cathay General Hospital Sijhih Branch, Taipei 22174, Taiwan

<sup>d</sup>Department of Botany and Microbiology, King Saud University, Riyadh 11451, Saudi Arabia

<sup>e</sup>Department of Surgery, Cathay General Hospital, Taipei 10630, Taiwan.

<sup>f</sup>Department of Surgery, Sijhih Cathay General Hospital, New Taipei 22174, Taiwan.

<sup>g</sup>Graduate Institute of Translational and Interdisciplinary Medicine, National Central University, No. 300, Jhongda RD., Jhongli, Taoyuan, 32001 Taiwan

<sup>h</sup>Graduate Institute of Medical Sciences and Department of Obstetrics & Gynecology, Tri-Service General Hospital, National Defense Medical Center, Taipei, 11490, Taiwan.

<sup>i</sup>R&D Center for Membrane Technology, Chung Yuan Christian University, Chungli, Taoyuan 320, Taiwan

<sup>j</sup>Department of Reproduction, National Center for Child Health and Development, 2-10-1 Okura, Setagaya-ku, Tokyo 157-8535, Japan

\* Correspondence author.

Department of Surgery, Cathay General Hospital, Taipei 10630, Taiwan.

Tel.: +886-2-26482121#7005; fax: +886-2-86462107. E-mail address: [hsinchuoff@cgh.org.tw](mailto:hsinchuoff@cgh.org.tw) (H.H.C. Lee)

Graduate Institute of Medical Sciences and Department of Obstetrics & Gynecology, Tri-Service General Hospital, National Defense Medical Center, Taipei, 11490, Taiwan

Tel.: +86 577-88068822; fax: +86 086-577-88832083. E-mail address: [gwojang@yahoo.com](mailto:gwojang@yahoo.com) (G.-J. Wu)

Department of Chemical and Materials Engineering, National Central University, No. 300, Jhongda RD., Jhongli, Taoyuan 32001, Taiwan & School of Ophthalmology and Optometry, Eye Hospital, Wenzhou Medical University, No. 270, Xueyuan Road, Wenzhou, Zhejiang, 325027, China

Tel.: +86 577-88068822; fax: +86 086-577-88832083.

E-mail address: [higuchi@ncu.edu.tw](mailto:higuchi@ncu.edu.tw) (A. Higuchi)

<sup>‡</sup>These authors contributed equally to this work.

## Supplementary Information

**Supplementary Table 1** Materials used in this study.

| Materials                                                                      | Abbreviation                      | Catalog No.  | Company                                             |
|--------------------------------------------------------------------------------|-----------------------------------|--------------|-----------------------------------------------------|
| <b>ECM</b>                                                                     |                                   |              |                                                     |
| Matrigel                                                                       | MAT                               | 356230       | Corning (Corning, NY, USA)                          |
| Recombinant vitronectin                                                        | rVN                               | A14700       | Thermo Fisher Scientific Inc. (Waltham, MA, USA)    |
| Collagen type I                                                                | COL                               | 354231       | Corning (Corning, NY, USA)                          |
| Fibronectin                                                                    | FN                                | 33016-015    | Thermo Fisher Scientific Inc. (Waltham, MA, USA)    |
| Laminin 511                                                                    | LN-511                            | 892011       | Nippi Inc. (Tokyo, Japan)                           |
| Laminin 521                                                                    | LN-521                            | BLA-LN521-05 | Veritas (Tokyo, Japan)                              |
| <b>Cell culture dishes</b>                                                     |                                   |              |                                                     |
| 6-well polystyrene plate                                                       | TCP                               | #353046      | Corning (Corning, NY, USA)                          |
| <b>Chemicals</b>                                                               |                                   |              |                                                     |
| Dispase II                                                                     | Dispase                           | D4693-1G     | Sigma-Aldrich (St. Louis, MO, USA)                  |
| Trypsin-EDTA (0.25%)                                                           | Trypsin-EDTA                      | 25200072     | Thermo Fisher Scientific Inc. (Waltham, MA, USA)    |
| Bone morphogenic protein 4                                                     | BMP4                              | H4916        | Sigma-Aldrich (St. Louis, MO, USA)                  |
| 3-(6-Methyl-2-pyridinyl)-N-phenyl-4-(4-quinoliny)-1H-pyrazole-1-carbothioamide | A83-01                            | SML0788      | Sigma-Aldrich (St. Louis, MO, USA)                  |
| L-ascorbic acid-2-phosphate                                                    | L-ascorbic acid-2-phosphate       | A8960-5G     | Sigma-Aldrich (St. Louis, MO, USA)                  |
| Dexamethasone                                                                  | DEX                               | D4902-500G   | Sigma-Aldrich (St. Louis, MO, USA)                  |
| <b>Cell culture medium and component</b>                                       |                                   |              |                                                     |
| Essential 8 medium                                                             | Essential 8                       | A1517001     | Thermo Fisher Scientific Inc. (Waltham, MA, USA)    |
| Essential 6 medium                                                             | Essential 6                       | A1516401     | Thermo Fisher Scientific Inc. (Waltham, MA, USA)    |
| DMEM/F12 medium                                                                | DMEM/F12                          | 11330-057    | Thermo Fisher Scientific Inc. (Waltham, MA, USA)    |
| $\alpha$ -MEM (Minimum Essential Medium)                                       | $\alpha$ -MEM                     | 12000022     | Thermo Fisher Scientific Inc. (Waltham, MA, USA)    |
| DMEM                                                                           | DMEM                              | D5648        | Sigma-Aldrich (St. Louis, MO, USA)                  |
| Fetal bovine serum                                                             | FBS                               | PSRPS-FB2    | Biological Industries (Kibbutz Beit-Haemek, Israel) |
| Alkaline Phosphatase Assay Kit                                                 | SensoLyte® pNPP                   | AS-72146     | AnaSpec, Inc. (Fremont, CA, USA)                    |
| <b>Antibodies</b>                                                              |                                   |              |                                                     |
| FITC Mouse Anti-Human CD34                                                     | Anti-CD34 antibody                | 555821       | BD Pharmingen (Franklin Lakes, NJ, USA)             |
| FITC Mouse IgG1                                                                | Anti-CD34 isotype antibody        | 555748       | BD Pharmingen (Franklin Lakes, NJ, USA)             |
| FITC Mouse Anti-Human CD44                                                     | Anti-CD44 antibody                | 555478       | BD Pharmingen (Franklin Lakes, NJ, USA)             |
| FITC Mouse IgG2b                                                               | Anti-CD44 isotype antibody        | 555742       | BD Pharmingen (Franklin Lakes, NJ, USA)             |
| PE Mouse Anti-Human CD73                                                       | Anti- $\alpha$ -actinin antibody  | 550257       | BD Pharmingen (Franklin Lakes, NJ, USA)             |
| PE Mouse Anti-Human CD90                                                       | Anti-MLC2v antibody               | 555596       | BD Pharmingen (Franklin Lakes, NJ, USA)             |
| PE Mouse IgG1                                                                  | Anti-CD73 (CD90) isotype antibody | 555749       | BD Pharmingen (Franklin Lakes, NJ, USA)             |
| PE Mouse Anti-Human CD105                                                      | Anti-CD105 antibody               | A07414       | Beckman Coulter (Brea, CA, USA)                     |
| PE Mouse IgG3 RPE                                                              | Anti-CD105 isotype antibody       | 0105-09      | SouthernBiotech (Birmingham, AL, USA)               |

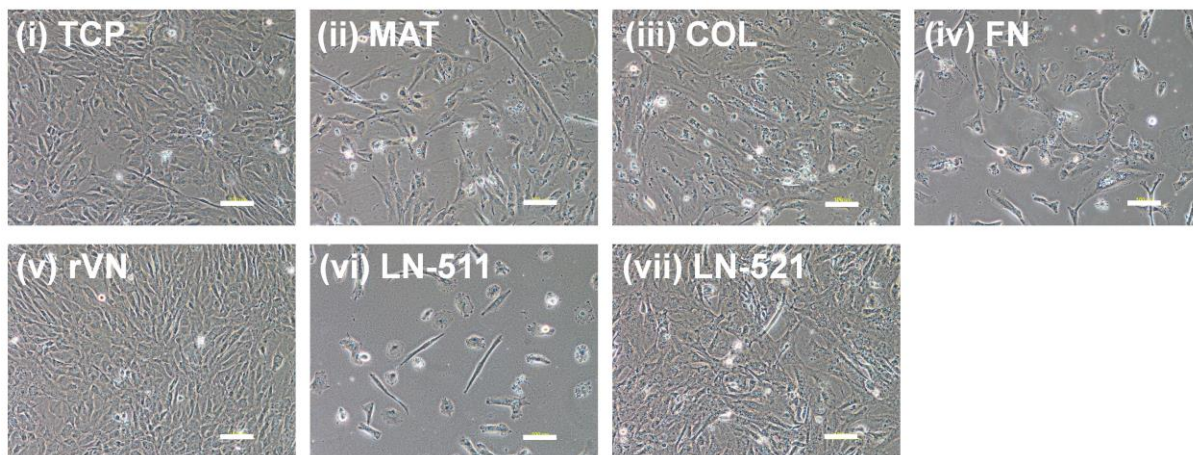

**Supplementary Fig. 1.** Differentiation of hiPSCs (H-M5) into hMSCs. Morphology of differentiated cells cultured on TCP dishes (i), MAT-coated dishes (ii), COL-coated TCP dishes (iii), FN-coated TCP dishes (iv), rVN-coated TCP dishes (v), LN-511-coated TCP dishes (vi) and LN-521-coated TCP dishes (vii) on day 7 at passage 10. The scale bar indicates 100  $\mu\text{m}$ .

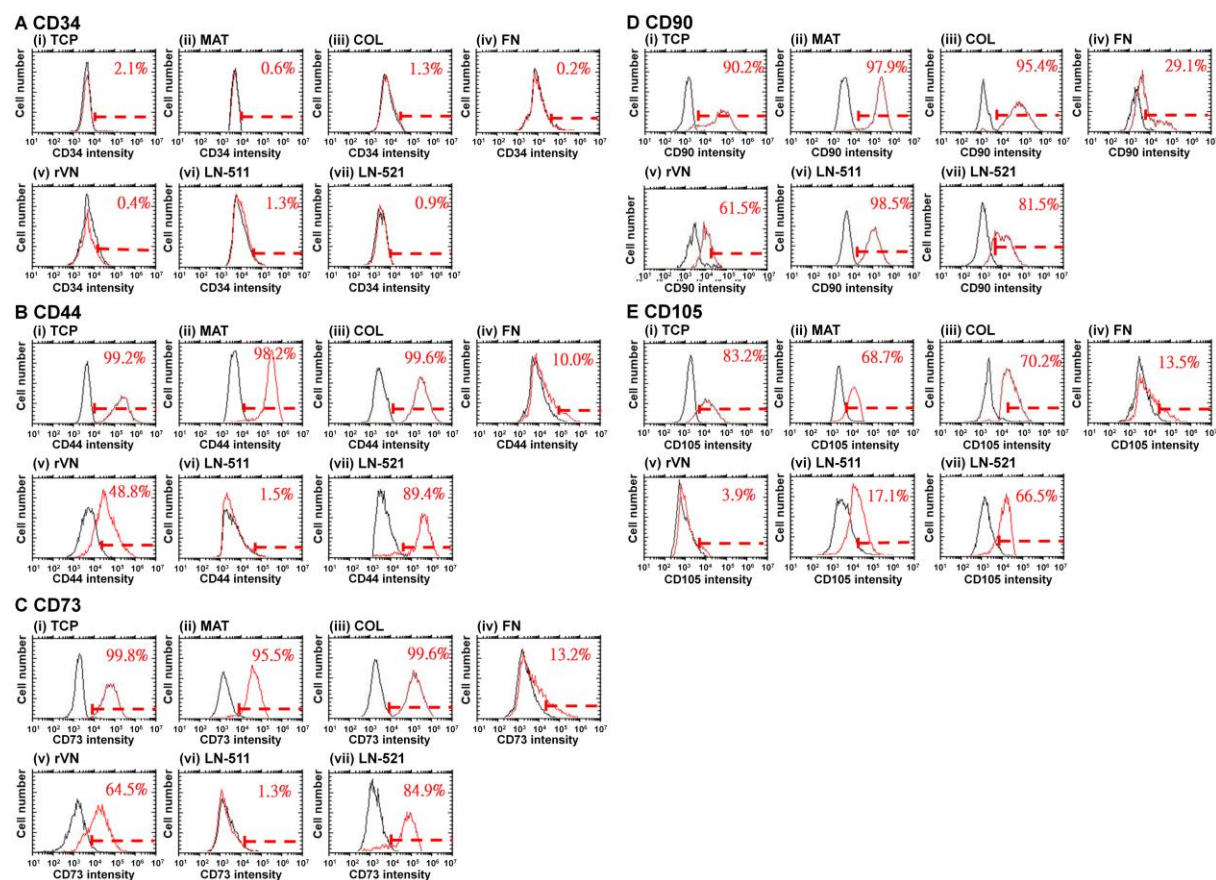

**Supplementary Fig. 2.** Flow cytometry histograms showing the expression of hMSC surface markers (CD44, CD70, CD93 and CD105) and a hematopoietic stem cell marker (CD34) on hESC (H9)-derived hMSCs cultured on TCP dishes and ECM-coated dishes at passage 6. (A-E) CD34 (A), CD44 (B), CD73(C), CD90 (D) and CD105 (E) expression on cells cultured on TCP dishes (i), MAT-coated dishes (ii), COL-coated TCP dishes (iii), FN-coated TCP dishes (iv), rVN-coated TCP dishes (v), LN-511-coated TCP dishes (vi) and LN-521-coated TCP dishes (vii). The black line illustrated the isotype antibody expression on the cells (negative control). The red line illustrated the expression of each CD marker on the cells.

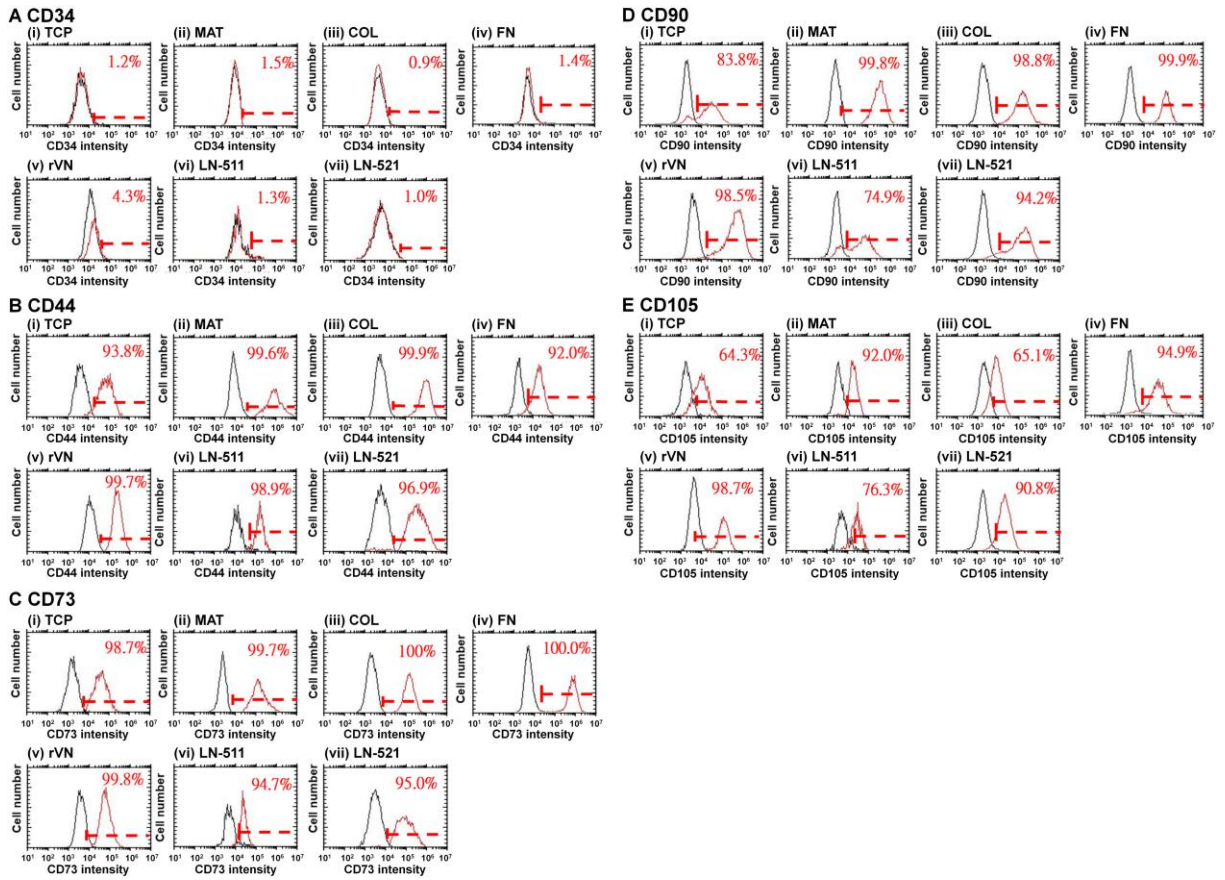

**Supplementary Fig. 3.** Flow cytometry histograms showing the expression of hMSC surface markers (CD44, CD70, CD93 and CD105) and a hematopoietic stem cell marker (CD34) on hiPSC (H-M5)-derived hMSCs cultured on TCP dishes and ECM-coated dishes at passage 6. (A-E) CD34 (A), CD44 (B), CD73(C), CD90 (D) and CD105 (E) expression on cells cultured on TCP dishes (i), MAT-coated dishes (ii), COL-coated TCP dishes (iii), FN-coated TCP dishes (iv), rVN-coated TCP dishes (v), LN-511-coated TCP dishes (vi) and LN-521-coated TCP dishes (vii). The black line illustrated the isotype antibody expression on the cells (negative control). The red line illustrated the expression of each CD marker on the cells.



## A Alizarin red S staining

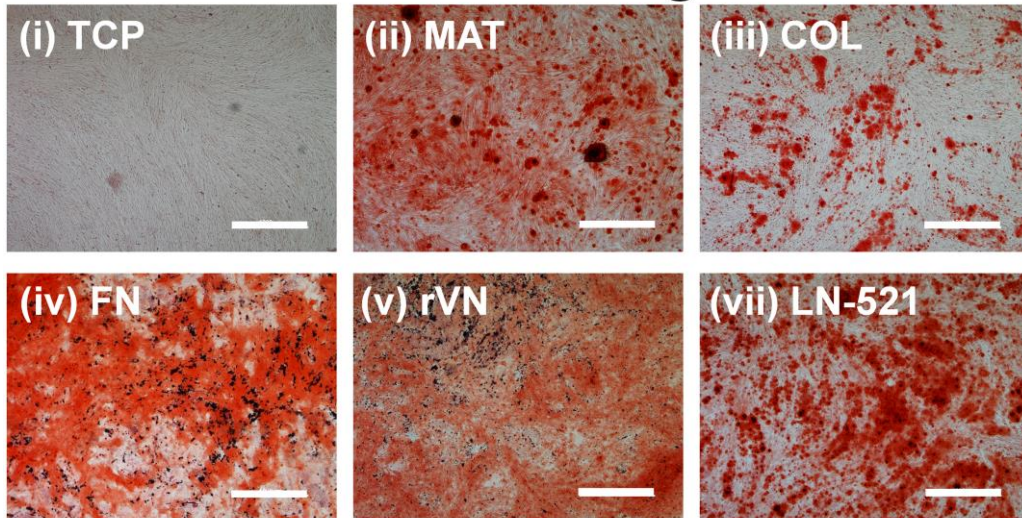

## B von Kossa staining

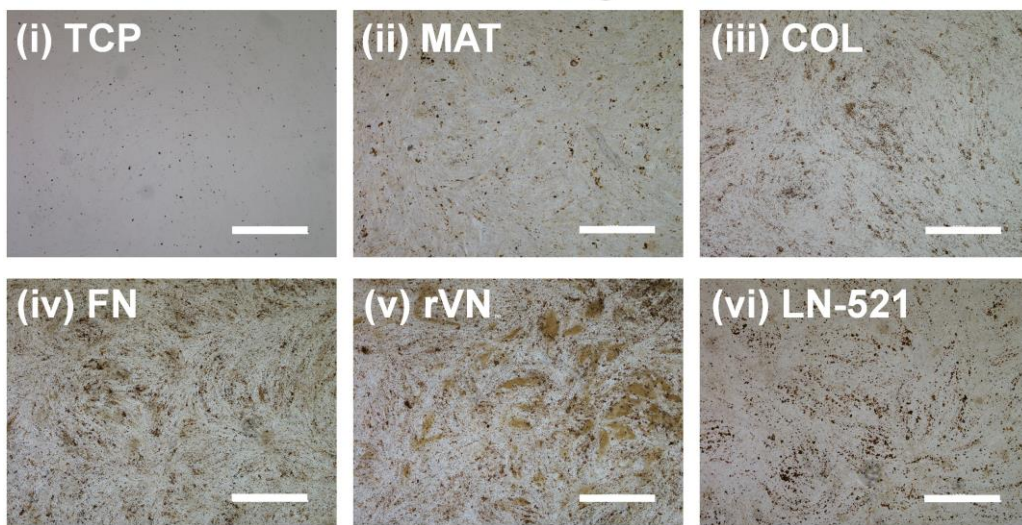

**Supplementary Fig. 4.** Osteogenic differentiation of hiPSC (H-M5)-derived hMSCs on day 28 of differentiation. (A) Micrograph of alizarin red S (calcium deposition)-stained cells cultured on TCP dishes (i), MAT-coated dishes (ii), COL-coated TCP dishes (iii), FN-coated TCP dishes (iv), rVN-coated TCP dishes (v), LN-511-coated TCP dishes (vi) and LN-521-coated TCP dishes (vii). The bar indicates 1000  $\mu\text{m}$ . (B) Micrograph of von Kossa (calcium phosphate deposition)-stained cells cultured on TCP dishes (i), MAT-coated dishes (ii), COL-coated TCP dishes (iii), FN-coated TCP dishes (iv), rVN-coated TCP dishes (v), LN-511-coated TCP dishes (vi) and LN-521-coated TCP dishes (vii). The bar indicates 1000  $\mu\text{m}$ .

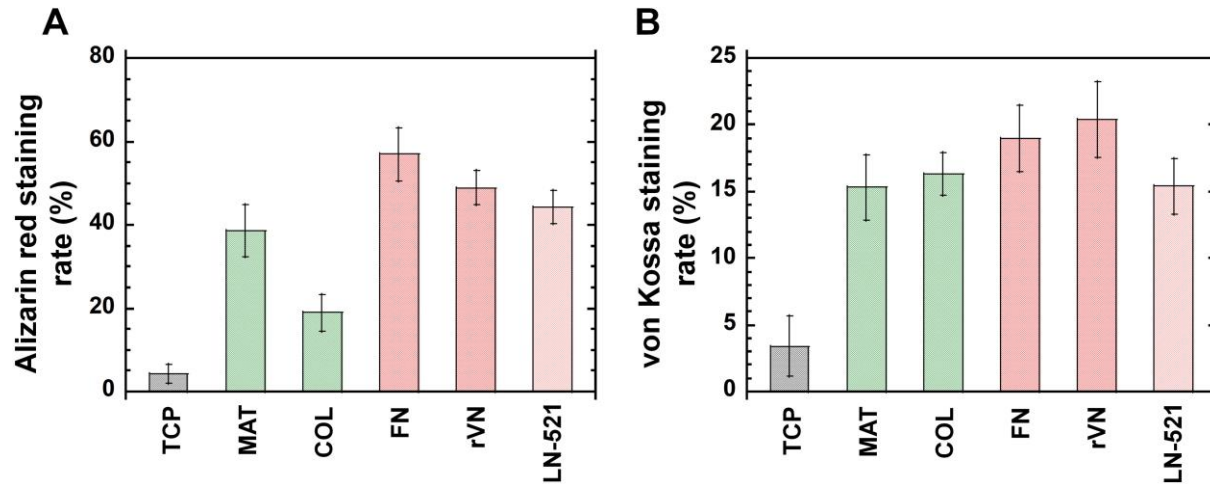

**Supplementary Fig. 5.** Osteogenic differentiation of hiPSC (H-M5)-derived hMSCs. (A) The level of osteogenic induction of cells cultured on TCP dishes and ECM-coated dishes was assessed by alizarin red S staining (calcium deposition) on day 28 of differentiation utilizing ImageJ software. (B) The level of osteogenic induction of cells cultured on TCP dishes and ECM-coated dishes was evaluated by von Kossa staining (calcium phosphate deposition) on day 28 of differentiation utilizing ImageJ software.
